# Supplementary material for: Predictors of Newborn’s Weight for Height: A Machine Learning Study Using Nationwide Multicenter Ultrasound Data
Source: MDPI journal article supplement (doi:10.3390/diagnostics11071280), 2021-07-16

**Table S1** Notations of Gestational Age and Ultrasound Measures

|                                | <i>Week 11-13</i> | <i>Week 14-19</i> | <i>Week 20</i> | <i>Week 21-35</i> |          |          | <i>Week 36-</i> |
|--------------------------------|-------------------|-------------------|----------------|-------------------|----------|----------|-----------------|
| <b>Gestational Age (Weeks)</b> | GA11W1            | GA14W1            | GA20W1         | GA21W1            | GA21W2   | GA21W3   | GA36W1          |
| <b>Gestational Age (Days)</b>  | GA11D1            | GA14D1            | GA20D1         | GA21D1            | GA21D2   | GA21D3   | GA36D1          |
| <b>Crown-Rump Length</b>       | GA11CRL1          |                   |                |                   |          |          |                 |
| <b>Nuchal Translucency</b>     | GA11NT1           |                   |                |                   |          |          |                 |
| <b>Biparietal Diameter</b>     |                   | GA14BPD1          | GA20BPD1       | GA21BPD1          | GA21BPD2 | GA21BPD3 | GA36BPD1        |
| <b>Head Circumference</b>      |                   | GA14HC1           | GA20HC1        | GA21HC1           | GA21HC2  | GA21HC3  | GA36HC1         |
| <b>Abdominal Circumference</b> |                   | GA14AC1           | GA20AC1        | GA21AC1           | GA21AC2  | GA21AC3  | GA36AC1         |
| <b>Femur Length</b>            |                   | GA14FL1           | GA20FL1        | GA21FL1           | GA21FL2  | GA21FL3  | GA36FL1         |
| <b>Estimated Fetal Weight</b>  |                   | GA14EFW1          | GA20EFW1       | GA21EFW1          | GA21EFW2 | GA21EFW3 | GA36EFW1        |
|                                |                   |                   |                |                   |          |          |                 |

**Note:**

Gestational age (W/D: weeks/days), crown-rump length (CRL) (mm) and nuchal translucency (NT) (mm) taken once during the week 11 - week 13 (GA11) are denoted by GA11W1, GA11D1, GA11CRL1 and GA11NT1. Gestational age (W/D: weeks/days), biparietal diameter (BPD) (mm), head circumference (HC) (mm), abdominal circumference (AC) (mm), femur length (FL) (mm) and estimated fetal weight (EFW) (g) taken once during the week 14 - week 19 (GA14), once in the week 20 (GA20), three times during the week 21 - week 35 (GA21) and once in the week 36 or later (GA36) are denoted by: GA14W1, GA14D1, GA20W1, GA20D1, GA21W1, GA21D1, GA21W2, GA21D2, GA21W3, GA21D3, GA36W1 and GA36D1 (gestational age); GA14BPD1, GA20BPD1, GA21BPD1, GA21BPD2, GA21BPD3 and GA36BPD1 (biparietal diameter); GA14HC1, GA20HC1, GA21HC1, GA21HC2, GA21HC3 and GA36HC1 (head circumference); GA14AC1, GA20AC1, GA21AC1, GA21AC2, GA21AC3 and GA36AC1 (abdominal circumference); GA14FL1, GA20FL1, GA21FL1, GA21FL2, GA21FL3 and GA36FL1 (femur length); GA14EFW1, GA20EFW1, GA21EFW1, GA21EFW2, GA21EFW3 and GA36EFW1 (estimated fetal weight).

**Table S2-1** Random Forest Variable Importance (VI) and Regression Coefficient from Run 1:  
All Variables (Dependent Variable: Newborn's Weight [g])

| Variable                                     | Random Forest |         | Linear Regression |         |
|----------------------------------------------|---------------|---------|-------------------|---------|
|                                              | VI Value      | VI Rank | Coefficient       | P-Value |
| Gestational Age - Delivery (Weeks)           | 81437955      | 1       | *170.2000         | 0.0000  |
| GA36EFW1 (g)                                 | 59566065      | 2       | *0.3300           | 0.0000  |
| GA36AC1 (mm)                                 | 40359557      | 3       | *3.3950           | 0.0055  |
| Maternal Weight at Delivery Time (kg)        | 12600886      | 4       | -2.9740           | 0.8606  |
| GA36BPD1 (mm)                                | 11536549      | 5       | 3.5670            | 0.2456  |
| Maternal BMI at Delivery Time                | 9183122       | 6       | 25.9200           | 0.5537  |
| Neonatal Intensive Care Unit Hospitalization | 8666421       | 7       | *-45.8000         | 0.0265  |
| GA36FL1 (mm)                                 | 8167498       | 8       | 0.8415            | 0.8153  |
| GA11CRL1 (mm)                                | 7670171       | 9       | -0.1804           | 0.8833  |
| GA21AC1 (mm)                                 | 7394983       | 10      | 1.7720            | 0.0624  |
| GA21BPD2 (mm)                                | 7337688       | 11      | 3.0080            | 0.3310  |
| Maternal Pregestational BMI                  | 6918490       | 12      | -12.7300          | 0.7878  |
| GA21AC2 (mm)                                 | 6435064       | 13      | 1.2240            | 0.1581  |
| GA21AC3 (mm)                                 | 6019105       | 14      | *3.7860           | 0.0039  |
| GA36HC1 (mm)                                 | 5840288       | 15      | -0.1518           | 0.8389  |
| GA21BPD1 (mm)                                | 5804584       | 16      | 3.5090            | 0.2108  |
| GA20AC1 (mm)                                 | 5174051       | 17      | 0.2379            | 0.3931  |
| GA20EFW1 (g)                                 | 5113174       | 18      | -0.2566           | 0.1524  |
| Maternal Pregestational Weight (kg)          | 5066332       | 19      | 1.8500            | 0.9193  |
| GA21EFW1 (g)                                 | 4834716       | 20      | *0.2289           | 0.0472  |
| GA21FL2 (mm)                                 | 4749409       | 21      | -3.1040           | 0.4481  |
| GA20HC1 (mm)                                 | 4713837       | 22      | -0.0199           | 0.9811  |
| GA21HC2 (mm)                                 | 4646094       | 23      | -0.6821           | 0.3531  |
| Apgar Score in 1 Minute After Delivery       | 4645375       | 24      | 0.4369            | 0.9574  |
| Apgar Score in 5 Minutes After Delivery      | 4632233       | 25      | 2.7750            | 0.8193  |
| GA21EFW3 (g)                                 | 4602151       | 26      | 0.0566            | 0.5850  |
| Maternal Height (cm)                         | 4570952       | 27      | 8.3310            | 0.3864  |
| GA14BPD1 (mm)                                | 4472051       | 28      | *6.8380           | 0.0270  |
| Maternal Age                                 | 4345422       | 29      | -2.3960           | 0.1433  |
| GA20BPD1 (mm)                                | 4297216       | 30      | -6.3500           | 0.0544  |
| GA21EFW2 (g)                                 | 4291562       | 31      | *0.2961           | 0.0005  |
| GA21FL1 (mm)                                 | 4270426       | 32      | -4.0100           | 0.2977  |
| GA21HC1 (mm)                                 | 4261178       | 33      | -0.3190           | 0.3783  |
| GA20FL1 (mm)                                 | 4222331       | 34      | *9.9590           | 0.0214  |
| GA14FL1 (mm)                                 | 4186594       | 35      | *-9.4160          | 0.0486  |
| GA11NT1 (mm)                                 | 4115745       | 36      | -2.3880           | 0.6990  |
| GA14AC1 (mm)                                 | 3751675       | 37      | -0.6944           | 0.5587  |
| GA14HC1 (mm)                                 | 3564844       | 38      | 0.9472            | 0.3295  |
| GA21D2                                       | 3276785       | 39      | *-15.1600         | 0.0002  |
| GA36W1                                       | 3209062       | 40      | *-90.3100         | 0.0000  |
| GA14EFW1 (g)                                 | 3195941       | 41      | 0.2681            | 0.6498  |
| GA21FL3 (mm)                                 | 3148541       | 42      | 3.1280            | 0.5050  |
| GA21BPD3 (mm)                                | 3037689       | 43      | -4.2120           | 0.2591  |
| Gestational Age - Delivery (Days)            | 2509973       | 44      | *26.3600          | 0.0000  |
| GA20D1                                       | 2486914       | 45      | -0.7006           | 0.8328  |
| GA21W2                                       | 2448127       | 46      | *-68.6300         | 0.0000  |
| GA21D1                                       | 2403058       | 47      | -4.9800           | 0.2280  |
| GA14D1                                       | 2332492       | 48      | 1.0580            | 0.8048  |

|                                      |         |    |           |        |
|--------------------------------------|---------|----|-----------|--------|
| GA21W3                               | 2210537 | 49 | *-48.2000 | 0.0000 |
| GA11W1                               | 2101369 | 50 | 8.0970    | 0.6390 |
| GA36D1                               | 2070967 | 51 | *-10.4800 | 0.0046 |
| GA11D1                               | 1873568 | 52 | 2.4760    | 0.5382 |
| GA21HC3 (mm)                         | 1870408 | 53 | -0.3961   | 0.6457 |
| GA21D3                               | 1695039 | 54 | -5.1410   | 0.2215 |
| Newborn's Sex - Female               | 1690467 | 55 | *-72.8900 | 0.0000 |
| GA21W1                               | 1672527 | 56 | *-42.2900 | 0.0002 |
| Number of Ultrasound Equipment Types | 1266183 | 57 | -1.0670   | 0.6962 |
| Caesarean Delivery                   | 1154290 | 58 | *83.4100  | 0.0000 |
| Maternal Abortions                   | 1112585 | 59 | -5.1360   | 0.5099 |
| Children Alive                       | 1096311 | 60 | *56.7900  | 0.0027 |
| Maternal Preterm Births              | 1093502 | 61 | -36.4600  | 0.0895 |
| GA14W1                               | 966830  | 62 | -2.5850   | 0.8723 |
| Maternal Term Births                 | 792117  | 63 | -13.2700  | 0.4956 |
| GA20W1                               | 0       | 64 |           |        |

#### Notes

|       |                                    |
|-------|------------------------------------|
| *:    | P-Value < 0.05                     |
| AC:   | Abdominal Circumference (mm)       |
| BPD:  | Biparietal Diameter (mm)           |
| CRL:  | Crown-Rump Length (mm)             |
| EFW:  | Estimated Fetal Weight (g)         |
| FL:   | Femur Length (mm)                  |
| HC:   | Head Circumference (mm)            |
| NT:   | Nuchal Translucency (mm)           |
| GA11: | Gestational Age, Week 11 - Week 13 |
| GA14: | Gestational Age, Week 14 - Week 19 |
| GA20: | Gestational Age, Week 20           |
| GA21: | Gestational Age, Week 21 - Week 35 |
| GA36: | Gestational Age, Week 36 or Later  |
| W/D:  | Gestational Age - Weeks/Days       |

**Table S2-2** Random Forest Variable Importance (VI) and Regression Coefficient from Run 1:  
All Variables (Dependent Variable: Benn Index: Newborn's Weight/Height)

| Variable                                     | Random Forest |         | Linear Regression |         |
|----------------------------------------------|---------------|---------|-------------------|---------|
|                                              | VI Value      | VI Rank | Coefficient       | P-Value |
| Gestational Age - Delivery (Weeks)           | 213           | 1       | *0.2775           | 0.0000  |
| GA36EFW1 (g)                                 | 162           | 2       | *0.0005           | 0.0026  |
| GA36AC1 (mm)                                 | 138           | 3       | *0.0070           | 0.0050  |
| Maternal Weight at Delivery Time (kg)        | 38            | 4       | 0.0093            | 0.7880  |
| Maternal BMI at Delivery Time                | 37            | 5       | 0.0004            | 0.9967  |
| GA36BPD1 (mm)                                | 36            | 6       | 0.0072            | 0.2503  |
| GA21AC1 (mm)                                 | 32            | 7       | 0.0033            | 0.0855  |
| GA11CRL1 (mm)                                | 32            | 8       | -0.0002           | 0.9216  |
| GA21BPD2 (mm)                                | 31            | 9       | 0.0041            | 0.5133  |
| GA21AC2 (mm)                                 | 27            | 10      | 0.0014            | 0.4243  |
| GA36FL1 (mm)                                 | 23            | 11      | 0.0039            | 0.5915  |
| Maternal Pregestational BMI                  | 22            | 12      | -0.0324           | 0.7362  |
| GA21EFW2 (g)                                 | 22            | 13      | *0.0007           | 0.0001  |
| Maternal Age                                 | 22            | 14      | -0.0049           | 0.1416  |
| GA21AC3 (mm)                                 | 21            | 15      | *0.0061           | 0.0218  |
| GA21EFW1 (g)                                 | 20            | 16      | *0.0006           | 0.0166  |
| GA21HC2 (mm)                                 | 20            | 17      | -0.0010           | 0.5015  |
| Neonatal Intensive Care Unit Hospitalization | 20            | 18      | -0.0460           | 0.2719  |
| GA21BPD1 (mm)                                | 19            | 19      | 0.0014            | 0.8032  |
| GA36HC1 (mm)                                 | 18            | 20      | -0.0016           | 0.2824  |
| GA20AC1 (mm)                                 | 18            | 21      | 0.0007            | 0.2050  |
| Maternal Pregestational Weight (kg)          | 18            | 22      | 0.0095            | 0.7981  |
| GA14FL1 (mm)                                 | 18            | 23      | -0.0176           | 0.0694  |
| Apgar Score in 1 Minute After Delivery       | 17            | 24      | 0.0016            | 0.9248  |
| GA21FL1 (mm)                                 | 17            | 25      | *-0.0188          | 0.0166  |
| GA21EFW3 (g)                                 | 17            | 26      | 0.0001            | 0.5429  |
| GA21HC1 (mm)                                 | 17            | 27      | -0.0008           | 0.2818  |
| GA20EFW1 (g)                                 | 17            | 28      | -0.0006           | 0.0912  |
| Maternal Height (cm)                         | 17            | 29      | -0.0026           | 0.8923  |
| GA21FL2 (mm)                                 | 16            | 30      | -0.0125           | 0.1315  |
| GA20BPD1 (mm)                                | 16            | 31      | -0.0076           | 0.2596  |
| GA14BPD1 (mm)                                | 16            | 32      | *0.0145           | 0.0214  |
| GA20HC1 (mm)                                 | 15            | 33      | -0.0004           | 0.8220  |
| GA11W1                                       | 14            | 34      | 0.0061            | 0.8621  |
| GA20FL1 (mm)                                 | 14            | 35      | 0.0134            | 0.1265  |
| GA11NT1 (mm)                                 | 13            | 36      | -0.0048           | 0.7014  |
| Apgar Score in 5 Minutes After Delivery      | 13            | 37      | 0.0130            | 0.5985  |
| GA14AC1 (mm)                                 | 13            | 38      | -0.0015           | 0.5294  |
| GA14HC1 (mm)                                 | 12            | 39      | 0.0002            | 0.9016  |
| GA14EFW1 (g)                                 | 12            | 40      | 0.0004            | 0.7231  |
| GA21BPD3 (mm)                                | 12            | 41      | -0.0060           | 0.4312  |
| GA21D2                                       | 11            | 42      | *-0.0258          | 0.0017  |
| GA21FL3 (mm)                                 | 11            | 43      | 0.0033            | 0.7297  |
| GA21W2                                       | 9             | 44      | *-0.1161          | 0.0000  |
| GA36W1                                       | 9             | 45      | *-0.1473          | 0.0000  |
| GA20D1                                       | 8             | 46      | -0.0016           | 0.8136  |
| GA14D1                                       | 8             | 47      | 0.0077            | 0.3783  |
| Gestational Age - Delivery (Days)            | 8             | 48      | *0.0433           | 0.0000  |

|                                      |   |    |          |        |
|--------------------------------------|---|----|----------|--------|
| GA21W3                               | 8 | 49 | *-0.0936 | 0.0000 |
| GA21D1                               | 8 | 50 | -0.0053  | 0.5268 |
| GA11D1                               | 7 | 51 | 0.0013   | 0.8756 |
| GA21HC3 (mm)                         | 7 | 52 | 0.0009   | 0.6186 |
| GA36D1                               | 6 | 53 | *-0.0201 | 0.0074 |
| GA21D3                               | 6 | 54 | -0.0058  | 0.4996 |
| GA21W1                               | 5 | 55 | *-0.0508 | 0.0249 |
| Newborn's Sex - Female               | 5 | 56 | *-0.1179 | 0.0000 |
| Maternal Abortions                   | 4 | 57 | 0.0024   | 0.8772 |
| Caesarean Delivery                   | 4 | 58 | *0.1594  | 0.0000 |
| Children Alive                       | 4 | 59 | *0.0883  | 0.0216 |
| Number of Ultrasound Equipment Types | 4 | 60 | 0.0026   | 0.6399 |
| GA14W1                               | 4 | 61 | 0.0127   | 0.6964 |
| Maternal Term Births                 | 4 | 62 | -0.0294  | 0.4582 |
| Maternal Preterm Births              | 4 | 63 | -0.0448  | 0.3044 |
| GA20W1                               | 0 | 64 |          |        |

#### Notes

|               |                                    |
|---------------|------------------------------------|
| <i>*</i> :    | P-Value < 0.05                     |
| <i>AC</i> :   | Abdominal Circumference (mm)       |
| <i>BPD</i> :  | Biparietal Diameter (mm)           |
| <i>CRL</i> :  | Crown-Rump Length (mm)             |
| <i>EFW</i> :  | Estimated Fetal Weight (g)         |
| <i>FL</i> :   | Femur Length (mm)                  |
| <i>HC</i> :   | Head Circumference (mm)            |
| <i>NT</i> :   | Nuchal Translucency (mm)           |
| <i>GA11</i> : | Gestational Age, Week 11 - Week 13 |
| <i>GA14</i> : | Gestational Age, Week 14 - Week 19 |
| <i>GA20</i> : | Gestational Age, Week 20           |
| <i>GA21</i> : | Gestational Age, Week 21 - Week 35 |
| <i>GA36</i> : | Gestational Age, Week 36 or Later  |
| <i>W/D</i> :  | Gestational Age - Weeks/Days       |

**Table S2-3** Random Forest Variable Importance (VI) and Regression Coefficient from Run 1: All Variables (Dependent Variable: Ponderal Index: Newborn's Weight/Height<sup>3</sup>)

| Variable                                | Random Forest |         | Linear Regression |         |
|-----------------------------------------|---------------|---------|-------------------|---------|
|                                         | VI Value      | VI Rank | Coefficient       | P-Value |
| GA21AC1 (mm)                            | 1804          | 1       | 0.0061            | 0.6314  |
| GA36AC1 (mm)                            | 1598          | 2       | 0.0296            | 0.0697  |
| Gestational Age - Delivery (Weeks)      | 1417          | 3       | *0.3250           | 0.0000  |
| GA21BPD2 (mm)                           | 1230          | 4       | 0.0145            | 0.7260  |
| Maternal BMI at Delivery Time           | 1205          | 5       | -0.1966           | 0.7364  |
| GA36EFW1 (g)                            | 1196          | 6       | 0.0006            | 0.5464  |
| GA21AC2 (mm)                            | 1068          | 7       | -0.0012           | 0.9168  |
| Maternal Age                            | 1054          | 8       | -0.0311           | 0.1542  |
| GA11CRL1 (mm)                           | 868           | 9       | 0.0031            | 0.8499  |
| GA21EFW2 (g)                            | 808           | 10      | *0.0031           | 0.0064  |
| Maternal Pregestational BMI             | 728           | 11      | -0.2214           | 0.7256  |
| Apgar Score in 5 Minutes After Delivery | 727           | 12      | -0.1616           | 0.3187  |
| GA21EFW1 (g)                            | 719           | 13      | *0.0032           | 0.0373  |
| GA36BPD1 (mm)                           | 672           | 14      | 0.0163            | 0.6903  |
| GA21HC2 (mm)                            | 671           | 15      | -0.0012           | 0.9037  |
| Maternal Weight at Delivery Time (kg)   | 662           | 16      | 0.0748            | 0.7408  |
| GA21FL2 (mm)                            | 657           | 17      | *-0.1148          | 0.0356  |
| GA20FL1 (mm)                            | 572           | 18      | -0.0284           | 0.6232  |
| GA20BPD1 (mm)                           | 559           | 19      | 0.0174            | 0.6932  |
| GA20EFW1 (g)                            | 558           | 20      | -0.0032           | 0.1774  |
| Maternal Height (cm)                    | 545           | 21      | -0.1067           | 0.4059  |
| GA36FL1 (mm)                            | 541           | 22      | 0.0587            | 0.2220  |
| GA11NT1 (mm)                            | 530           | 23      | -0.0205           | 0.8034  |
| GA21BPD1 (mm)                           | 527           | 24      | -0.0365           | 0.3298  |
| GA14BPD1 (mm)                           | 520           | 25      | 0.0536            | 0.1934  |
| GA21FL1 (mm)                            | 512           | 26      | *-0.1944          | 0.0002  |
| GA20AC1 (mm)                            | 489           | 27      | 0.0057            | 0.1269  |
| GA20HC1 (mm)                            | 472           | 28      | -0.0023           | 0.8358  |
| Maternal Pregestational Weight (kg)     | 462           | 29      | 0.0990            | 0.6846  |
| GA21AC3 (mm)                            | 462           | 30      | 0.0126            | 0.4697  |
| GA14HC1 (mm)                            | 444           | 31      | -0.0049           | 0.7033  |
| GA14FL1 (mm)                            | 437           | 32      | -0.0740           | 0.2455  |
| Apgar Score in 1 Minute After Delivery  | 431           | 33      | 0.0915            | 0.4015  |
| GA11W1                                  | 426           | 34      | -0.0138           | 0.9522  |
| GA21FL3 (mm)                            | 407           | 35      | 0.0151            | 0.8092  |
| GA21HC1 (mm)                            | 398           | 36      | -0.0063           | 0.1907  |
| GA21BPD3 (mm)                           | 375           | 37      | -0.0044           | 0.9290  |
| GA21EFW3 (g)                            | 374           | 38      | 0.0005            | 0.7374  |
| GA14AC1 (mm)                            | 370           | 39      | -0.0016           | 0.9180  |
| GA36HC1 (mm)                            | 355           | 40      | -0.0150           | 0.1332  |
| GA14EFW1 (g)                            | 317           | 41      | 0.0003            | 0.9701  |
| GA21D2                                  | 316           | 42      | -0.0900           | 0.0951  |
| GA21HC3 (mm)                            | 308           | 43      | 0.0209            | 0.0686  |
| GA21W1                                  | 240           | 44      | 0.1859            | 0.2112  |
| GA21W2                                  | 233           | 45      | -0.2402           | 0.0631  |
| GA11D1                                  | 232           | 46      | -0.0273           | 0.6116  |
| GA14D1                                  | 219           | 47      | 0.0539            | 0.3455  |
| GA20D1                                  | 218           | 48      | -0.0015           | 0.9730  |

|                                              |     |     |         |        |
|----------------------------------------------|-----|-----|---------|--------|
| Gestational Age - Delivery (Days)            | 217 | 49  | 0.0555  | 0.1816 |
| GA21D1                                       | 209 | 50  | 0.0506  | 0.3582 |
| GA21D3                                       | 186 | 51  | 0.0240  | 0.6686 |
| GA36D1                                       | 171 | 52  | -0.0703 | 0.1538 |
| Number of Ultrasound Equipment Types         | 150 | 53  | 0.0532  | 0.1448 |
| GA21W3                                       | 149 | *54 | -0.3869 | 0.0012 |
| Maternal Term Births                         | 144 | 55  | -0.1025 | 0.6934 |
| Neonatal Intensive Care Unit Hospitalization | 143 | 56  | 0.0954  | 0.7289 |
| Children Alive                               | 137 | 57  | 0.0747  | 0.7672 |
| Maternal Abortions                           | 137 | 58  | 0.0837  | 0.4208 |
| GA36W1                                       | 106 | *59 | -0.3329 | 0.0153 |
| Caesarean Delivery                           | 99  | *60 | 0.4253  | 0.0158 |
| Maternal Preterm Births                      | 99  | 61  | -0.1428 | 0.6180 |
| GA14W1                                       | 87  | 62  | 0.0974  | 0.6498 |
| Newborn's Sex - Female                       | 62  | 63  | -0.2758 | 0.1077 |
| GA20W1                                       | 0   | 64  |         |        |

## Notes

|       |                                    |
|-------|------------------------------------|
| *:    | P-Value < 0.05                     |
| AC:   | Abdominal Circumference (mm)       |
| BPD:  | Biparietal Diameter (mm)           |
| CRL:  | Crown-Rump Length (mm)             |
| EFW:  | Estimated Fetal Weight (g)         |
| FL:   | Femur Length (mm)                  |
| HC:   | Head Circumference (mm)            |
| NT:   | Nuchal Translucency (mm)           |
| GA11: | Gestational Age, Week 11 - Week 13 |
| GA14: | Gestational Age, Week 14 - Week 19 |
| GA20: | Gestational Age, Week 20           |
| GA21: | Gestational Age, Week 21 - Week 35 |
| GA36: | Gestational Age, Week 36 or Later  |
| W/D:  | Gestational Age - Weeks/Days       |

**Figure S1-1** Random Forest Variable Importance Values of Top 20 Predictors for Newborn’s Weight

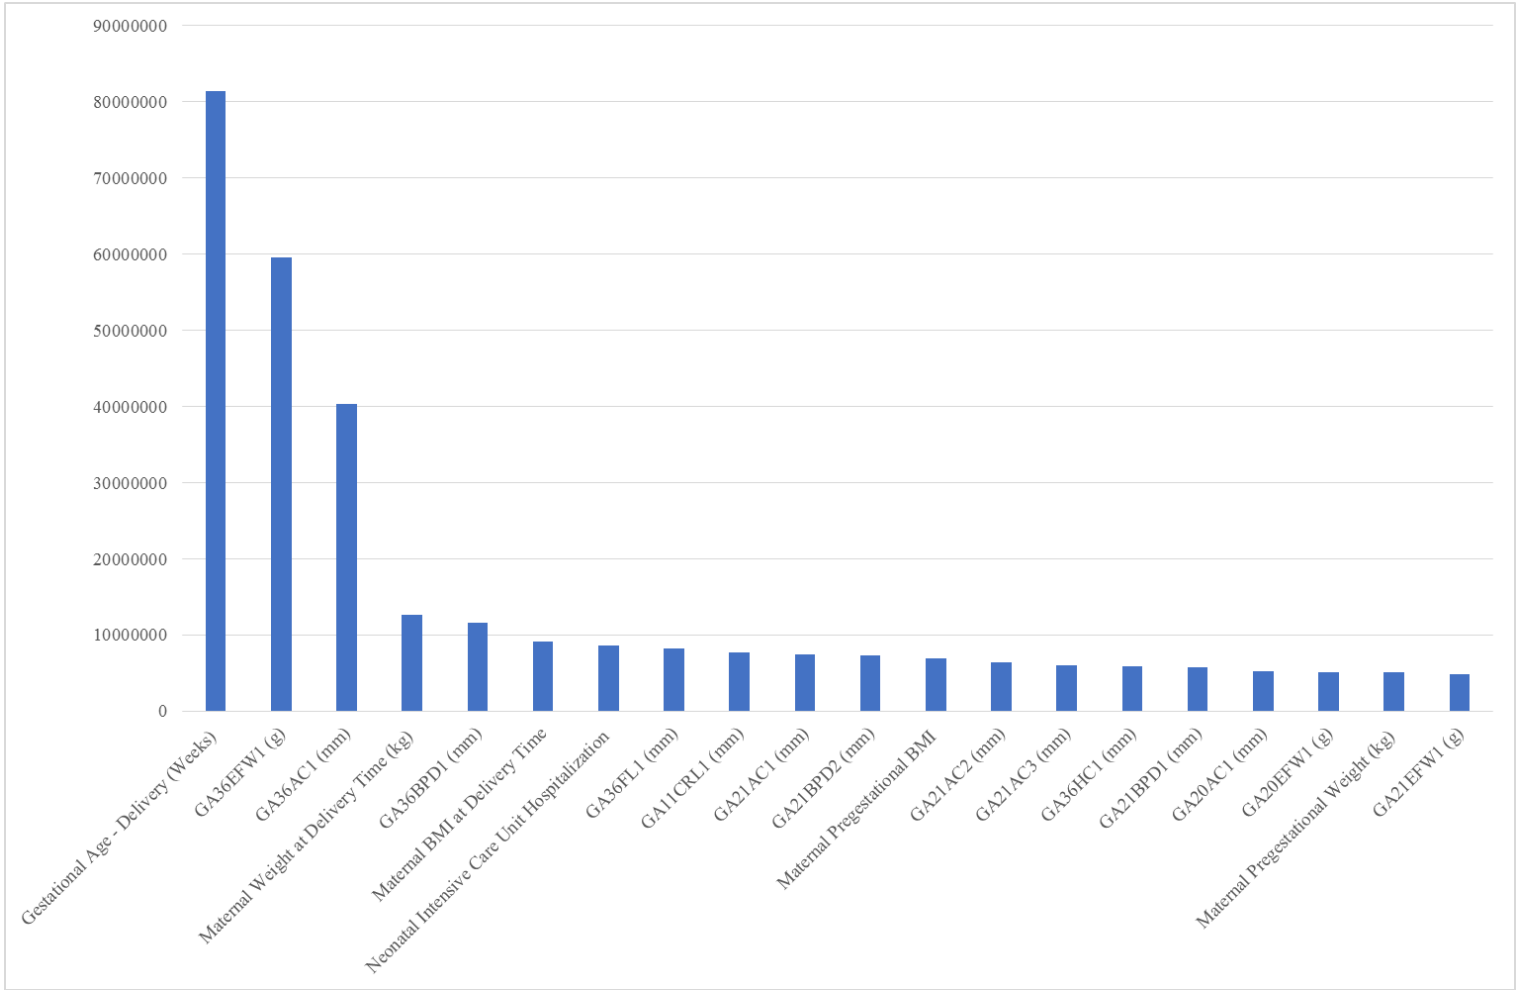



**Figure S1-2** Random Forest Variable Importance Values of Top 20 Predictors for Newborn’s Weight/Height

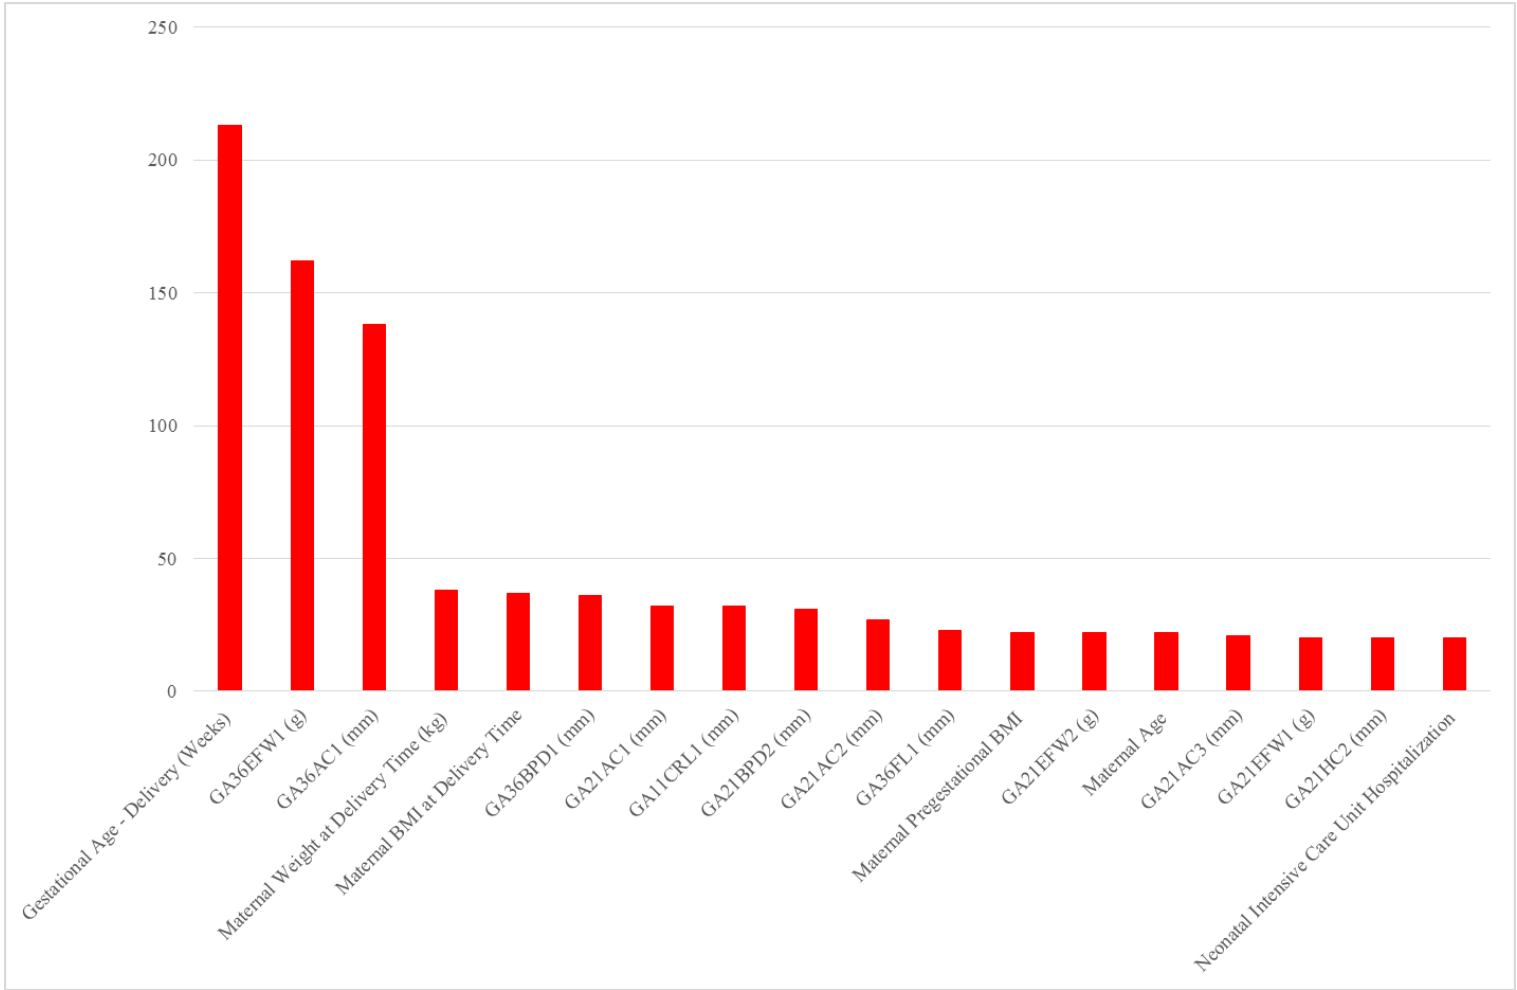

**Figure S1-3** Random Forest Variable Importance Values of Top 20 Predictors for Newborn’s Weight/Height<sup>3</sup>

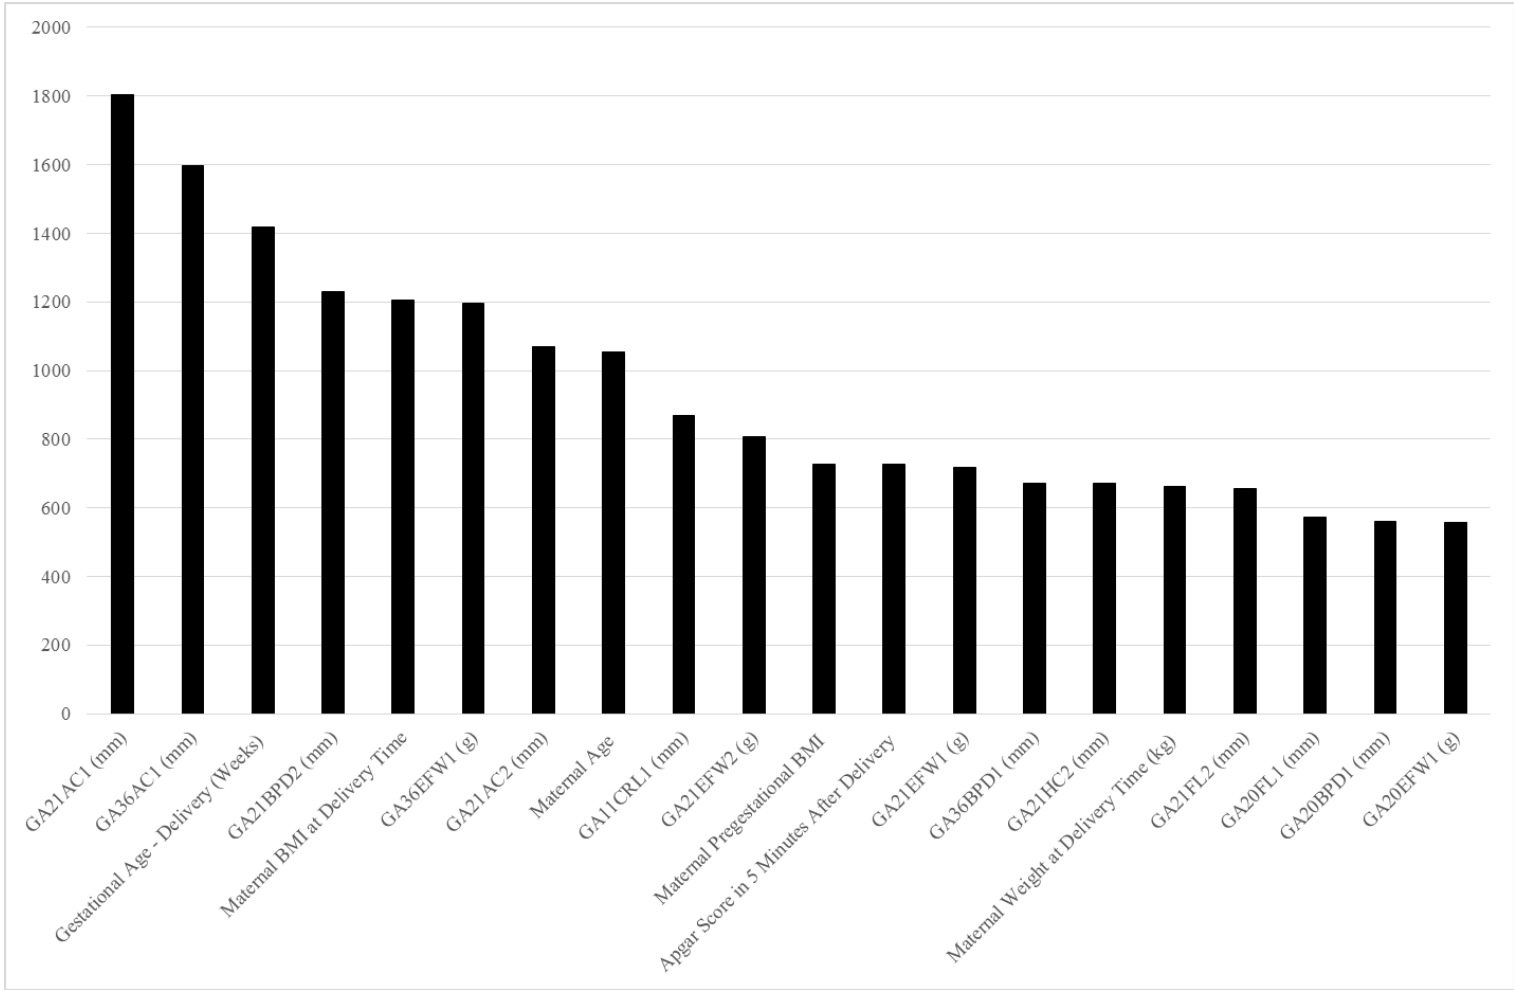

Supplement: s1 [file s1]
